# Supplementary material for: A differentially-methylated-region signature predicts the recurrence risk for patients with early stage lung adenocarcinoma
Source: publisher site journal article supplement (doi:10.18632/aging.206139), 2024-11-18
Supplement: Supplementary file [file aging-vnull-206139-supplementary-material-SD1.pdf]

**SUPPLEMENTARY FIGURES**

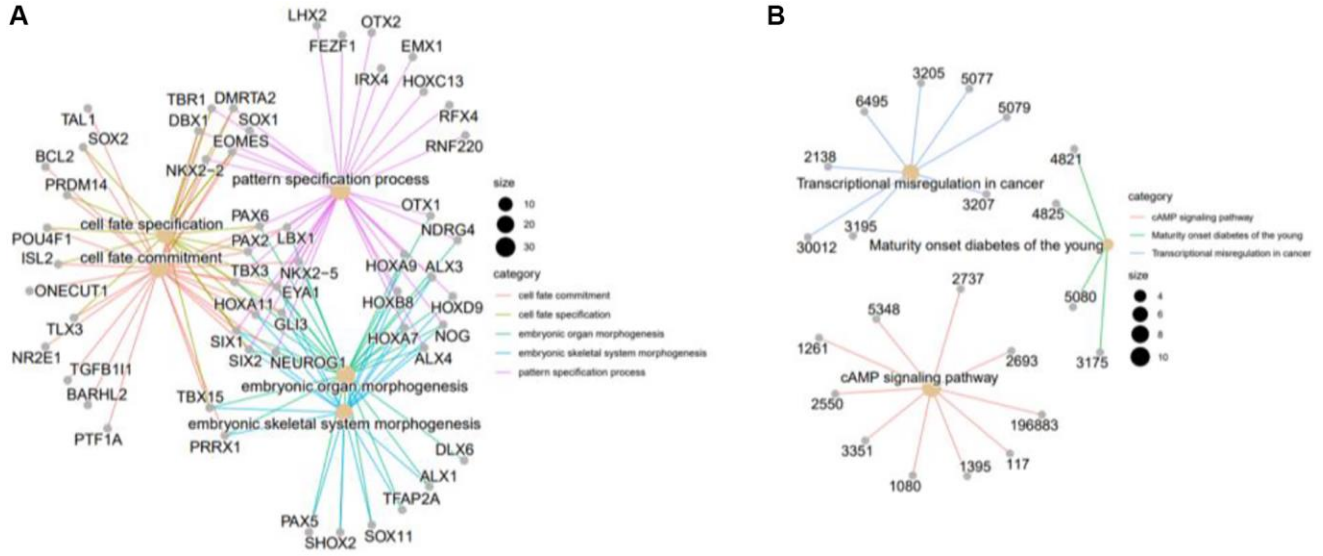

**Supplementary Figure 1.** GO analysis (A) and KEGG analysis (B) of the genes corresponding to the DMRs.

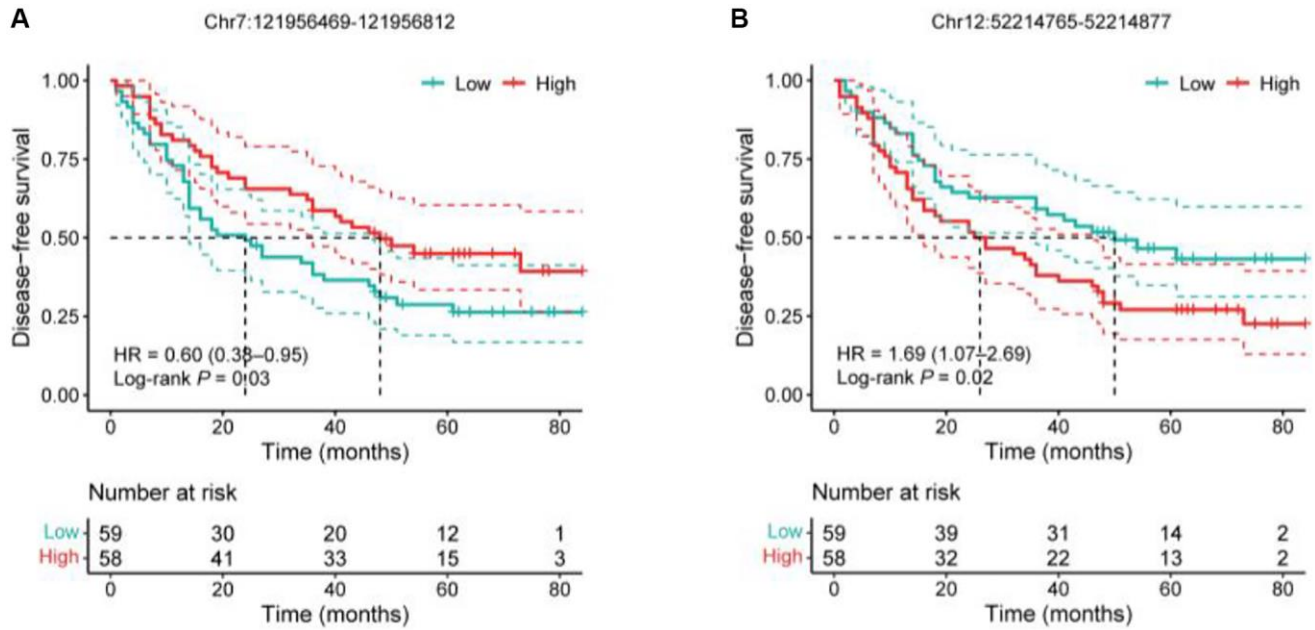

**Supplementary Figure 2.** Survival analysis of the DMR with the minimum HR (A) and maximum HR (B) for DFS.

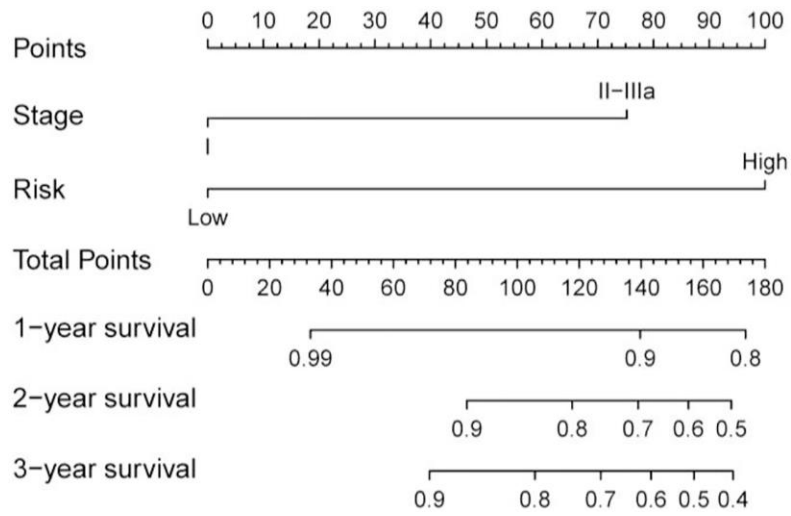

**Supplementary Figure 3.** Nomogram integrating risk score and TNM stage for DFS prediction in the validation cohort.
