# Supplementary material for: A differentially-methylated-region signature predicts the recurrence risk for patients with early stage lung adenocarcinoma
Source: publisher site journal article supplement (doi:10.18632/aging.206139), 2024-11-18
Supplement: Supplementary file [file aging-vnull-206139-supplementary-material-SD3.pdf]

## SUPPLEMENTARY TABLE

**Supplementary Table 2. Gene annotation of the 15 DMRs included in the prognostic signature.**

| <b>DMR</b>                | <b>Gene</b> | <b>Location</b>                       |
|---------------------------|-------------|---------------------------------------|
| Chr1:91184904-91185172    | BARHL2      | Intergenic                            |
| Chr10:101295774-101295800 | NKX2-3      | 3'UTR (NM_145285, exon 2 of 2)        |
| Chr12:130823622-130823679 | PIWIL1      | intron (NM_001190971, intron 1 of 19) |
| Chr12:130823684-130823752 | PIWIL1      | intron (NM_001190971, intron 1 of 19) |
| Chr12:52214768-52214875   | FIGNL2      | exon (NM_001013690, exon 2 of 2)      |
| Chr14:51560318-51560324   | TRIM9       | intron (NM_052978, intron 1 of 6)     |
| Chr15:89920992-89920998   | MIR9-3HG    | promoter-TSS (NR_015411)              |
| Chr16:22825312-22825444   | HS3ST2      | promoter-TSS (NM_006043)              |
| Chr19:35630034-35630095   | FXYD1       | promoter-TSS (NM_001278718)           |
| Chr19:35630102-35630162   | FXYD1       | promoter-TSS (NM_001278718)           |
| Chr3:138679202-138679208  | FOXL2NB     | Intergenic                            |
| Chr5:16179936-16180187    | 44631       | promoter-TSS (NR_149044)              |
| Chr5:72678351-72678360    | LINC02230   | Intergenic                            |
| Chr6:78172230-78172498    | HTR1B       | exon (NM_000863, exon 1 of 1)         |
| Chr7:121956472-121956810  | FEZF1       | Intergenic                            |
