# Supplementary material for: A differentially-methylated-region signature predicts the recurrence risk for patients with early stage lung adenocarcinoma
Source: Aging (Albany NY). 2024 Nov 18;16(21):13323–39. doi: 10.18632/aging.206139 (PMC11719112; doi:10.18632/aging.206139)
Supplement: Supplementary Table 1 [file aging-16-206139-s002.xlsx]

## Sheet: Sheet 1
Supplementary Table 1. Identification of DMRs between LUAD samples and matched adjacent tissue samples in the marker discovery cohort.
DMR	Mean difference	P	P_adjust
chr1:6515338-6515524	0.110658	6.50798e-07	4.3103e-06
chr1:29586402-29586725	0.154456	1.26334e-07	1.02748e-06
chr1:44883734-44883866	0.110833	6.01563e-06	3.05448e-05
chr1:46951147-46951227	0.117879	4.24068e-07	2.93983e-06
chr1:47696619-47696739	0.136175	8.20634e-11	1.7535e-09
chr1:50886777-50887058	0.173256	2.18819e-15	2.93359e-13
chr1:62660573-62660592	0.100359	0.00530037	0.0129054
chr1:63785677-63785715	0.152551	2.57556e-16	6.48728e-14
chr1:63787152-63787332	0.114294	3.3646e-15	4.11273e-13
chr1:63795932-63796095	0.103939	7.72825e-16	1.25955e-13
chr1:91182141-91182659	0.103982	6.72374e-20	9.31461e-17
chr1:91183125-91183223	0.141907	0.000345046	0.00112516
chr1:91185254-91185492	0.156754	7.1062e-12	2.20398e-10
chr1:91190883-91190989	0.101502	8.15375e-13	3.78626e-11
chr1:91194506-91194600	0.128565	1.01653e-12	4.44706e-11
chr1:91195330-91195380	0.118595	4.29932e-08	3.9795e-07
chr1:98510746-98510758	0.129382	3.74261e-08	3.51509e-07
chr1:110610728-110610958	0.132787	1.3565e-18	1.02502e-15
chr1:119528296-119528434	0.127553	4.19492e-12	1.45284e-10
chr1:161276315-161276321	0.157953	1.40837e-10	2.78061e-09
chr1:170630455-170630762	0.102049	2.18977e-16	5.87142e-14
chr1:179545398-179545462	0.113996	8.50238e-10	1.29673e-08
chr1:193155781-193155810	0.120448	3.24225e-11	7.94972e-10
chr1:197879844-197879927	0.123353	3.06341e-09	4.00993e-08
chr1:197888066-197888127	0.131009	3.43866e-05	0.00014553
chr1:235814143-235814301	0.115686	9.10653e-13	4.11377e-11
chr10:23484386-23484470	0.104294	4.38983e-06	2.29952e-05
chr10:101295774-101295800	0.102748	1.67401e-06	9.80577e-06
chr10:102984497-102984617	0.112846	1.94244e-10	3.65284e-09
chr11:31826270-31826495	0.102031	6.20159e-14	4.68614e-12
chr11:31841390-31841403	0.11059	1.0002e-05	4.83695e-05
chr11:32454838-32454991	0.100845	2.18819e-15	2.93359e-13
chr11:43596359-43596365	0.147718	0.00692246	0.0162587
chr11:44326422-44326520	0.116878	3.57799e-09	4.58247e-08
chr12:52214768-52214875	-0.109873	1.03648e-07	8.6498e-07
chr12:85673198-85673429	0.173791	3.3646e-15	4.11273e-13
chr12:113901277-113901381	0.108807	5.25075e-09	6.25276e-08
chr12:130823622-130823679	0.141975	2.63566e-08	2.58955e-07
chr13:52979725-52979731	0.130532	0.00498887	0.0122395
chr13:100643181-100643274	0.119691	1.53919e-10	2.9892e-09
chr14:24803894-24804096	0.11263	9.74005e-07	6.16226e-06
chr14:29243669-29243789	0.110137	2.35766e-06	1.32054e-05
chr14:37132679-37132788	0.130114	1.07673e-10	2.22632e-09
chr14:51562716-51562722	0.125215	0.00351833	0.00908278
chr14:52735419-52735572	0.108156	5.83425e-13	2.80314e-11
chr14:57261291-57261428	0.128666	3.8653e-09	4.86057e-08
chr14:57262334-57262345	0.177843	1.42821e-07	1.15164e-06
chr14:57265289-57265420	0.105514	5.18181e-11	1.19311e-09
chr14:57274879-57275065	0.109111	3.3646e-15	4.11273e-13
chr14:57278380-57278386	0.161957	4.65467e-13	2.35912e-11
chr14:61104477-61104667	0.174406	1.01665e-14	1.006e-12
chr14:69726098-69726121	0.109006	3.74577e-07	2.62963e-06
chr15:63891781-63891863	-0.112943	4.17458e-09	5.14823e-08
chr15:68122176-68122291	0.142995	1.40957e-12	5.74332e-11
chr15:76629949-76630034	0.101693	7.74211e-07	5.01578e-06
chr16:22825951-22826121	0.10513	1.05775e-07	8.80963e-07
chr16:29796739-29796803	0.154295	4.98796e-12	1.68385e-10
chr16:66612787-66612977	0.113194	4.24068e-07	2.93983e-06
chr16:89035594-89035850	-0.117428	2.67423e-12	9.96782e-11
chr17:35292224-35292311	0.101578	5.665e-09	6.66736e-08
chr17:46692651-46692657	0.182697	0.00426184	0.0106829
chr17:46796744-46796984	0.149927	1.28946e-13	8.85787e-12
chr17:54675293-54675299	0.136537	2.87691e-05	0.000124287
chr17:72755634-72755652	-0.183337	6.05722e-08	5.39631e-07
chr18:28622306-28622334	0.123512	2.91565e-07	2.13147e-06
chr18:60988252-60988258	-0.134009	0.000103377	0.000383678
chr19:18118498-18118504	0.102856	3.90189e-05	0.000163966
chr19:35630102-35630162	0.14184	2.00518e-10	3.73701e-09
chr19:38747344-38747365	0.103168	0.0128325	0.0280338
chr2:45240409-45240730	0.1299	2.2384e-09	3.07023e-08
chr2:63279057-63279164	0.122116	7.10345e-09	8.18916e-08
chr2:63285946-63286080	0.163746	4.35655e-10	7.33029e-09
chr2:73147310-73147442	0.100114	2.68668e-10	4.79221e-09
chr2:105478776-105478819	0.166078	1.07673e-10	2.22632e-09
chr2:162273266-162273355	0.135025	1.76397e-09	2.48932e-08
chr2:176948014-176948112	0.141583	1.84543e-08	1.89607e-07
chr2:223162698-223163047	0.104808	6.76105e-15	7.11365e-13
chr20:21496662-21496668	0.121116	0.000320276	0.00105431
chr20:25062285-25062388	0.102158	3.8948e-06	2.06333e-05
chr20:61808852-61808947	0.162199	0.00669349	0.015802
chr22:20792609-20792641	0.132356	0.000129457	0.00046907
chr22:28839247-28839396	0.113754	4.2333e-11	1.01112e-09
chr3:27772484-27772490	0.203484	1.82464e-05	8.32403e-05
chr3:129693498-129693639	0.125151	1.34894e-07	1.09282e-06
chr3:137484047-137484161	0.135359	1.68161e-10	3.23553e-09
chr3:181414271-181414277	0.107723	2.98375e-06	1.62416e-05
chr4:206863-207021	0.148351	3.56367e-11	8.68658e-10
chr4:41751901-41751996	0.101313	2.07381e-13	1.2491e-11
chr4:41882562-41882702	0.110336	4.23485e-19	5.02858e-16
chr4:57521928-57522075	0.146407	2.18854e-10	4.02458e-09
chr4:57522465-57522511	0.144191	4.50742e-09	5.51778e-08
chr4:81189747-81189779	0.173262	2.60653e-18	1.54753e-15
chr4:188916555-188916633	0.111889	6.91672e-05	0.000269282
chr5:16179936-16180187	0.109962	8.24961e-09	9.31668e-08
chr5:72529814-72529873	0.141097	4.74136e-10	7.91369e-09
chr5:72595556-72595629	0.118591	1.04625e-15	1.58117e-13
chr5:72678351-72678360	0.219342	2.83778e-06	1.55304e-05
chr5:76924023-76924097	0.144993	2.86591e-10	5.0792e-09
chr5:77268940-77268959	0.140256	1.84324e-13	1.14336e-11
chr5:134880234-134880491	0.118896	7.75254e-15	8.05489e-13
chr5:140753529-140753574	0.16445	7.49077e-11	1.62993e-09
chr5:170736487-170736736	0.116681	4.46045e-15	5.01017e-13
chr5:170742671-170742754	0.151033	1.63227e-11	4.34855e-10
chr5:170745537-170745603	0.100362	6.54061e-05	0.000257901
chr6:6004229-6004296	0.152143	4.46045e-15	5.01017e-13
chr6:27235702-27235938	0.104797	1.84543e-08	1.89607e-07
chr6:27463045-27463254	0.119675	1.04625e-15	1.58117e-13
chr6:33172975-33172981	-0.141756	0.000209046	0.000717559
chr6:100067031-100067122	0.114204	5.17914e-11	1.19311e-09
chr6:100909013-100909406	0.108762	4.26154e-14	3.54219e-12
chr6:108488365-108488434	0.172708	3.7053e-13	1.97426e-11
chr7:21209176-21209308	0.208426	1.85917e-16	5.15113e-14
chr7:27205450-27205676	0.142105	6.76105e-15	7.11365e-13
chr7:27223990-27224159	0.101264	0.00198254	0.00541001
chr7:27242140-27242193	0.149131	8.24961e-09	9.31668e-08
chr7:27282085-27282148	0.18794	6.20159e-14	4.68614e-12
chr7:42267700-42267862	0.132788	5.11711e-06	2.64182e-05
chr7:98990458-98990563	0.134972	4.34047e-08	4.00422e-07
chr7:121941895-121941901	0.109788	1.07507e-05	5.16531e-05
chr7:121950116-121950433	0.118938	7.20647e-10	1.12806e-08
chr7:121956472-121956810	0.100674	2.07381e-13	1.2491e-11
chr7:132171326-132171367	0.111363	1.13225e-05	5.41499e-05
chr7:152622260-152622303	0.122598	1.501e-11	4.02462e-10
chr8:70982253-70982366	0.108414	1.28823e-10	2.58019e-09
chr8:85096900-85097250	0.105279	1.74884e-11	4.60012e-10
chr8:95246367-95246447	0.191173	1.32871e-14	1.25502e-12
chr8:109095973-109096068	0.124283	3.56367e-11	8.68658e-10
chr9:842628-842773	0.115394	5.21263e-13	2.56375e-11
chr9:79637569-79637597	0.132402	4.39044e-06	2.29952e-05
chr1:1566533-1566789	0.128131	4.84687e-06	2.51638e-05
chr1:20669763-20669932	0.125961	7.34265e-07	4.78308e-06
chr1:22140844-22141053	0.115716	1.31772e-05	6.23014e-05
chr1:50887062-50887141	0.202903	5.21263e-13	2.56375e-11
chr1:50893645-50893806	0.115061	5.75916e-12	1.85543e-10
chr1:62660604-62660905	0.155795	4.15648e-16	8.03457e-14
chr1:63785699-63785937	0.149303	1.58214e-17	5.71773e-15
chr1:67217948-67218001	0.16512	1.57615e-16	4.51758e-14
chr1:78512285-78512291	0.157625	5.59565e-05	0.000225235
chr1:91185493-91185580	0.21581	3.3646e-15	4.11273e-13
chr1:110610993-110611069	0.133537	1.501e-11	4.02462e-10
chr1:119528467-119528554	0.129346	6.63163e-10	1.04994e-08
chr1:119531203-119531276	0.137297	4.65467e-13	2.35912e-11
chr1:169396484-169396490	0.1127	0.000575588	0.00177539
chr1:197888729-197888843	0.150642	1.65497e-11	4.38093e-10
chr1:201708724-201709283	-0.112237	1.01151e-11	2.92949e-10
chr1:240161076-240161243	0.107371	2.94869e-11	7.2945e-10
chr10:99532045-99532051	0.167214	0.000633576	0.00193478
chr11:20182159-20182263	0.117962	2.21219e-10	4.0591e-09
chr11:31826556-31826743	0.110777	5.89111e-15	6.35934e-13
chr11:44325974-44325980	0.131548	0.00651787	0.0154614
chr12:6054360-6054548	-0.114104	0.0131907	0.0287183
chr12:54321682-54321775	0.135804	1.11607e-12	4.80966e-11
chr12:106974458-106974560	0.10689	1.1171e-11	3.16905e-10
chr12:130389070-130389164	0.117304	1.28823e-10	2.58019e-09
chr12:130823684-130823752	0.131299	1.32143e-05	6.23014e-05
chr13:28491672-28491716	0.102186	8.28279e-12	2.47649e-10
chr13:79161065-79161178	0.116038	1.3608e-11	3.73301e-10
chr13:100624170-100624297	0.124726	2.07381e-13	1.2491e-11
chr13:100642166-100642191	0.132914	1.28452e-08	1.38481e-07
chr13:112722206-112722506	0.101309	1.39084e-05	6.53881e-05
chr14:29234956-29234985	0.138818	2.08302e-05	9.33372e-05
chr14:51560318-51560324	0.18436	0.00140367	0.0039577
chr14:57261441-57261509	0.127869	3.31116e-09	4.28697e-08
chr14:57265414-57265495	0.172147	7.72825e-16	1.25955e-13
chr14:57279317-57279432	0.10821	6.23471e-11	1.40062e-09
chr14:61104691-61104700	0.154789	8.0822e-09	9.24061e-08
chr14:65637712-65637914	0.108236	2.83344e-09	3.73834e-08
chr16:31488139-31488305	-0.186959	6.77084e-12	2.11576e-10
chr16:58535214-58535599	-0.105224	1.13413e-12	4.80966e-11
chr16:66613031-66613124	0.126869	4.86554e-09	5.92337e-08
chr16:89044986-89045078	-0.155985	1.48592e-08	1.56539e-07
chr17:80329987-80330045	0.150312	2.97045e-12	1.08768e-10
chr2:5833350-5833485	0.116178	2.69863e-05	0.00011744
chr2:14774120-14774126	0.150097	0.000155249	0.000548187
chr2:27530380-27530536	0.120879	2.83344e-09	3.73834e-08
chr2:45168143-45168223	0.202746	1.58214e-17	5.71773e-15
chr2:63279171-63279239	0.128999	9.23118e-10	1.38252e-08
chr2:63286102-63286253	0.184161	1.2647e-12	5.28249e-11
chr2:98963657-98963691	0.113885	1.27898e-09	1.84885e-08
chr2:105459607-105459727	0.104487	1.03055e-08	1.13757e-07
chr2:162283543-162283602	0.107779	1.74839e-12	6.88751e-11
chr2:175193644-175193650	0.102928	0.0021908	0.00593118
chr2:175200840-175201017	0.118772	1.25456e-06	7.65068e-06
chr2:176987363-176987523	0.103462	8.62108e-19	7.96204e-16
chr2:186603391-186603477	0.132029	9.89595e-07	6.23617e-06
chr2:190044485-190044508	0.151263	1.1171e-11	3.16905e-10
chr2:223163173-223163357	0.100789	2.94284e-13	1.64167e-11
chr2:223177157-223177406	0.107486	5.96362e-18	2.60893e-15
chr20:25065037-25065043	0.101856	0.000608068	0.00186495
chr20:35490358-35490367	0.119806	1.40722e-06	8.43925e-06
chr20:47445165-47445171	0.101805	0.00402116	0.0101531
chr22:28839496-28839502	0.127043	7.46516e-06	3.70893e-05
chr22:37808865-37809011	-0.112872	1.49132e-06	8.87956e-06
chr3:125677426-125677432	0.114338	0.00439568	0.0109737
chr3:138679202-138679208	0.111899	0.000339537	0.00110893
chr3:170137568-170137718	0.109524	5.96362e-18	2.60893e-15
chr4:41753566-41753572	0.132276	1.28535e-05	6.09807e-05
chr4:41882949-41882967	0.103936	0.000910226	0.00268291
chr4:57522081-57522265	0.15714	1.84324e-13	1.14336e-11
chr4:81189607-81189655	0.11152	1.12204e-09	1.64778e-08
chr4:81189815-81189834	0.121861	1.57026e-12	6.24497e-11
chr4:163085073-163085102	0.115202	7.5838e-05	0.000291431
chr4:174452131-174452180	0.101908	2.06812e-09	2.87943e-08
chr4:188916631-188916879	0.100415	2.62003e-09	3.50124e-08
chr5:528488-528793	0.107199	8.25259e-08	7.05716e-07
chr5:1884103-1884122	0.107557	0.000123764	0.000450208
chr5:79330757-79330803	0.141334	3.31116e-09	4.28697e-08
chr5:170735856-170736025	0.113699	5.68165e-16	1.02665e-13
chr5:170743392-170743485	0.114911	1.40957e-12	5.74332e-11
chr5:180479481-180479487	-0.107964	0.000716888	0.00216998
chr6:6004296-6004498	0.102718	1.20027e-12	5.0643e-11
chr6:10415927-10416038	0.101239	2.12224e-07	1.61984e-06
chr6:26183663-26183696	0.131462	0.000249671	0.000842233
chr6:29596984-29597009	-0.112693	2.12224e-07	1.61984e-06
chr6:78172190-78172206	0.151506	3.02837e-07	2.20264e-06
chr6:100912763-100913042	0.139573	1.6373e-13	1.06592e-11
chr6:108439984-108440032	0.102267	5.15858e-10	8.47394e-09
chr6:108490737-108490921	0.104353	1.45347e-13	9.82213e-12
chr6:152957082-152957175	0.130339	5.25075e-09	6.25276e-08
chr7:21209336-21209499	0.131107	4.92339e-21	1.9749e-17
chr7:27196403-27196534	0.129446	3.74261e-08	3.51509e-07
chr7:27244529-27244559	0.161797	2.83344e-09	3.73834e-08
chr7:30722442-30722496	0.109947	6.91672e-05	0.000269282
chr7:32339052-32339099	0.121824	4.34629e-06	2.28071e-05
chr7:42267894-42267914	0.127865	6.50798e-07	4.3103e-06
chr7:96622058-96622208	0.12287	1.00674e-11	2.92949e-10
chr7:98990624-98990783	0.141239	1.54564e-10	2.99471e-09
chr7:99157098-99157122	-0.107586	1.53697e-07	1.22018e-06
chr7:121941926-121942177	0.124831	1.91714e-12	7.48766e-11
chr7:121956844-121957054	0.113191	6.23471e-11	1.40062e-09
chr7:128337852-128337898	0.110228	0.000813365	0.00242497
chr7:129423207-129423358	0.124954	7.12789e-21	1.9749e-17
chr7:155252794-155252820	0.121404	5.25075e-09	6.25276e-08
chr7:155259972-155260016	0.100353	3.36449e-05	0.000143047
chr8:70982411-70982448	0.159734	0.000169361	0.000592479
chr8:72469344-72469557	0.157929	4.98796e-12	1.68385e-10
chr8:95246474-95246677	0.119304	1.01665e-14	1.006e-12
chr8:105479077-105479192	0.127452	1.1074e-07	9.17718e-07
chr8:144650589-144650595	0.103222	0.000155234	0.000548187
chr8:145106127-145106223	0.148461	4.74136e-10	7.91369e-09
chr9:116355883-116355983	0.131344	4.65467e-13	2.35912e-11
chr9:140780607-140780704	-0.139192	1.84324e-13	1.14336e-11
chr1:6514777-6515017	0.154253	7.54244e-07	4.89866e-06
chr1:47998997-47999300	0.113	5.4347e-08	4.88359e-07
chr1:63785374-63785401	0.115214	1.22335e-06	7.4989e-06
chr1:63785935-63786243	0.171621	8.01834e-17	2.66594e-14
chr1:76082537-76082621	0.110179	3.30667e-14	2.86303e-12
chr1:91182926-91183062	0.137679	1.99042e-07	1.52906e-06
chr1:91184904-91185172	0.111869	8.62108e-19	7.96204e-16
chr1:91190411-91190417	0.104074	0.00145437	0.00408542
chr1:91192288-91192301	0.108997	0.000285563	0.000950961
chr1:91195046-91195084	0.127492	3.98594e-07	2.77946e-06
chr1:110611651-110611862	0.132004	1.28987e-12	5.36068e-11
chr1:119527219-119527364	0.114337	2.60454e-10	4.66572e-09
chr1:156815391-156815431	0.1723	1.11677e-07	9.2323e-07
chr1:197888845-197889053	0.162505	1.41001e-15	1.98645e-13
chr10:22765474-22765524	0.102946	9.25392e-07	5.88963e-06
chr10:101287581-101287677	0.126162	3.29978e-06	1.78566e-05
chr10:102419146-102419227	0.153579	2.40642e-12	9.05077e-11
chr10:102895104-102895194	0.10545	6.11778e-12	1.94088e-10
chr10:118897891-118897996	0.121104	1.13413e-12	4.80966e-11
chr10:119303152-119303377	0.102977	8.14899e-07	5.2426e-06
chr11:31838584-31838700	0.131258	3.37328e-10	5.86584e-09
chr11:31848486-31848685	0.10859	5.4764e-14	4.37691e-12
chr11:44326258-44326324	0.113772	6.79685e-08	5.97835e-07
chr11:44332911-44332917	0.107014	0.00114148	0.00327624
chr11:133825150-133825156	0.115713	0.00606252	0.0145725
chr12:115136296-115136353	0.1664	4.15648e-16	8.03457e-14
chr12:130823753-130823809	0.102001	2.1048e-06	1.1983e-05
chr13:79170134-79170389	0.113999	5.25075e-09	6.25276e-08
chr13:100627173-100627317	0.121069	6.11778e-12	1.94088e-10
chr13:100641488-100641564	0.106539	1.84543e-08	1.89607e-07
chr13:112759192-112759309	0.155995	3.75523e-14	3.15288e-12
chr14:57261557-57261761	0.106509	2.06812e-09	2.87943e-08
chr14:57265497-57265667	0.135203	4.46045e-15	5.01017e-13
chr14:57274606-57274664	0.227818	1.08329e-18	9.00433e-16
chr14:57275446-57275559	0.174551	5.96362e-18	2.60893e-15
chr14:57278683-57278802	0.156311	1.15646e-11	3.26955e-10
chr14:60952462-60952558	0.125486	2.38788e-10	4.3242e-09
chr14:61119101-61119334	0.119193	2.38788e-10	4.3242e-09
chr14:74893167-74893187	0.113843	1.98821e-06	1.13973e-05
chr15:53097901-53098003	0.157315	1.17937e-09	1.71981e-08
chr15:68121680-68121708	0.130012	7.39063e-06	3.68389e-05
chr16:31488308-31488458	-0.139878	2.51841e-10	4.53097e-09
chr16:89045141-89045238	-0.186937	1.17937e-09	1.71981e-08
chr17:46691649-46691749	0.13828	9.69893e-08	8.17622e-07
chr17:46824762-46824897	0.140939	2.62035e-13	1.50209e-11
chr17:48042647-48042774	0.120849	8.99728e-16	1.43818e-13
chr17:72755458-72755467	-0.138991	1.25456e-06	7.65068e-06
chr18:76740583-76740797	0.113631	5.24773e-07	3.5871e-06
chr19:3869289-3869295	-0.14721	2.80195e-05	0.000121491
chr19:11590250-11590358	0.11254	0.00044357	0.00140402
chr19:36523983-36524040	0.100065	2.79138e-06	1.52946e-05
chr19:52391000-52391133	0.123712	3.25504e-08	3.09211e-07
chr2:45168221-45168414	0.101673	2.62035e-13	1.50209e-11
chr2:63280966-63280999	0.122688	1.03055e-08	1.13757e-07
chr2:80530103-80530238	0.101226	8.54144e-11	1.81577e-09
chr2:96050829-96050841	0.130767	1.44004e-07	1.15537e-06
chr2:105480356-105480508	0.115555	8.9691e-14	6.53958e-12
chr2:128433673-128433679	0.118683	0.0114269	0.0253661
chr2:139538446-139538624	0.1251	0.00440693	0.0109935
chr2:162280349-162280574	0.119562	1.00195e-09	1.48719e-08
chr2:176947784-176947893	0.141996	7.20647e-10	1.12806e-08
chr2:176987555-176987594	0.111033	5.52528e-12	1.79399e-10
chr2:186603493-186603734	0.116343	3.02508e-16	6.79579e-14
chr2:190044599-190044642	0.127784	4.15412e-13	2.15807e-11
chr2:223163374-223163493	0.136028	3.30309e-13	1.81823e-11
chr20:21501689-21501714	0.12266	1.83658e-10	3.48531e-09
chr20:25062507-25062613	0.115737	5.13916e-08	4.65323e-07
chr20:30063179-30063195	0.104533	0.000515564	0.00160922
chr20:30458859-30458865	0.107109	0.00782917	0.0181321
chr20:44452631-44452648	0.109173	0.00032734	0.00107501
chr22:28839665-28839818	0.130692	5.68165e-16	1.02665e-13
chr22:42679332-42679448	0.144541	1.13413e-12	4.80966e-11
chr22:46262732-46262746	0.113664	1.77092e-07	1.38605e-06
chr3:12837727-12837824	-0.117743	1.18104e-06	7.27708e-06
chr3:129693342-129693441	0.121659	2.1644e-12	8.1775e-11
chr3:138679243-138679530	0.115012	1.14324e-13	8.05305e-12
chr3:157821985-157822162	0.124617	1.01653e-12	4.44706e-11
chr3:172165726-172165907	0.111342	1.32871e-14	1.25502e-12
chr4:52917269-52917307	-0.104237	7.9394e-05	0.000303134
chr4:57522278-57522366	0.188043	3.75523e-14	3.15288e-12
chr4:81189658-81189670	0.136326	2.62035e-13	1.50209e-11
chr4:107958624-107958630	0.109527	1.53306e-06	9.102e-06
chr5:320733-320746	0.10036	0.000496151	0.00155452
chr5:5139694-5139700	0.129526	5.76887e-05	0.000230866
chr5:42951964-42951970	0.112442	0.000608262	0.00186495
chr5:72595721-72595811	0.116243	1.32871e-14	1.25502e-12
chr5:115152418-115152628	0.102542	2.63537e-11	6.6784e-10
chr5:170736056-170736184	0.10261	6.63043e-16	1.12474e-13
chr5:170743511-170743729	0.144971	1.01665e-14	1.006e-12
chr5:172671524-172671693	0.112067	3.3646e-15	4.11273e-13
chr6:10882088-10882094	0.130982	0.000218526	0.000746257
chr6:33161436-33161442	0.183557	6.37818e-05	0.000252803
chr6:34164562-34164578	-0.132724	0.000427156	0.00135568
chr6:36808536-36808651	0.1387	1.3608e-11	3.73301e-10
chr6:78172230-78172498	0.106483	3.24225e-11	7.94972e-10
chr6:100913043-100913068	0.153201	4.93443e-08	4.48742e-07
chr6:108490974-108491054	0.121062	5.43747e-10	8.89689e-09
chr6:150286623-150286650	0.106671	4.75335e-05	0.000194835
chr7:27195792-27195937	0.1226	5.36844e-12	1.79207e-10
chr7:27204832-27205118	0.132986	2.18819e-15	2.93359e-13
chr7:27209802-27209930	0.10666	1.18027e-07	9.68718e-07
chr7:39649222-39649366	0.239919	3.30667e-14	2.86303e-12
chr7:117119771-117119783	0.131952	0.0038414	0.00981546
chr7:129423402-129423505	0.141297	2.57556e-16	6.48728e-14
chr7:139208995-139209021	0.152179	1.07188e-05	5.15595e-05
chr7:155258668-155258674	0.138426	0.0064611	0.0153579
chr8:67875493-67875603	0.106746	1.57026e-12	6.24497e-11
chr8:72469558-72469646	0.159943	1.40957e-12	5.74332e-11
chr8:77586357-77586443	0.176493	2.5582e-14	2.2621e-12
chr8:105479204-105479387	0.105353	9.23118e-10	1.38252e-08
chr8:144650593-144650897	0.146174	3.65981e-12	1.29448e-10
chr8:145106230-145106357	0.137904	2.74481e-09	3.65623e-08
chr9:841268-841274	0.12505	0.0011395	0.00327168
chr9:116356054-116356113	0.135723	6.23471e-11	1.40062e-09
chr9:124461006-124461012	-0.208181	0.0125499	0.0274875
chr9:126777509-126777785	0.108772	4.35655e-10	7.33029e-09
chr1:44883528-44883720	0.10152	1.98271e-08	2.01717e-07
chr1:46956663-46956669	0.144822	0.000857708	0.00254344
chr1:47698194-47698200	0.119227	9.11834e-06	4.45571e-05
chr1:63785406-63785622	0.162181	1.7214e-12	6.81345e-11
chr1:63787045-63787098	0.169319	9.10653e-13	4.11377e-11
chr1:63791834-63791935	0.104473	1.3608e-11	3.73301e-10
chr1:63795763-63795888	0.118995	1.28823e-10	2.58019e-09
chr1:76082686-76082859	0.116885	7.71471e-14	5.72542e-12
chr1:86622830-86622853	0.204558	1.38172e-08	1.47242e-07
chr1:91183059-91183125	0.163814	4.51084e-07	3.10639e-06
chr1:91185181-91185187	0.167111	0.00461726	0.0114426
chr1:91190452-91190714	0.150062	6.63043e-16	1.12474e-13
chr1:91195131-91195276	0.12131	8.28279e-12	2.47649e-10
chr1:110673292-110673342	0.105852	0.000275102	0.000919316
chr1:119527375-119527549	0.114791	2.08465e-09	2.89275e-08
chr1:119530619-119530715	0.108702	8.48742e-08	7.21344e-07
chr1:170630304-170630401	0.141752	6.20159e-14	4.68614e-12
chr1:193155700-193155706	0.161864	8.20634e-11	1.7535e-09
chr1:197879613-197879806	0.142635	2.10376e-18	1.34511e-15
chr1:197887783-197887971	0.123406	1.33426e-16	4.10753e-14
chr1:205819175-205819195	0.109852	0.00112665	0.00323702
chr10:22765579-22765812	0.130888	6.72374e-20	9.31461e-17
chr10:23463420-23463547	0.124082	1.6373e-13	1.06592e-11
chr10:94180311-94180557	0.103768	1.28823e-10	2.58019e-09
chr10:102419243-102419371	0.133649	1.84324e-13	1.14336e-11
chr11:31819617-31819623	0.124045	0.0223405	0.0455245
chr11:31826066-31826141	0.118404	4.01177e-08	3.73832e-07
chr11:31838714-31838830	0.105169	1.84068e-08	1.89607e-07
chr11:44326349-44326424	0.116678	2.51841e-10	4.53097e-09
chr11:131780274-131780282	0.127514	4.98796e-12	1.68385e-10
chr12:54321481-54321573	0.111604	9.23118e-10	1.38252e-08
chr12:115120815-115120939	0.111165	4.30043e-11	1.01838e-09
chr12:115135781-115135789	0.101747	0.000114498	0.000418953
chr12:130823803-130823861	0.115248	3.12131e-06	1.6946e-05
chr13:28492493-28492543	0.100345	1.10934e-08	1.21167e-07
chr13:79170425-79170472	0.137187	5.25075e-09	6.25276e-08
chr13:84453318-84453412	0.15311	3.3646e-15	4.11273e-13
chr13:100627332-100627464	0.108446	3.7053e-13	1.97426e-11
chr13:112710651-112710724	0.1342	5.06668e-06	2.62558e-05
chr13:112720563-112720646	0.113373	4.00173e-10	6.83006e-09
chr13:112759313-112759527	0.124292	1.91026e-09	2.67759e-08
chr14:26674200-26674230	0.121635	0.000103397	0.000383678
chr14:37132515-37132669	0.113395	1.50287e-09	2.15007e-08
chr14:57261755-57262242	0.11805	2.76838e-13	1.57608e-11
chr14:57274673-57274833	0.143618	8.01834e-17	2.66594e-14
chr14:57276180-57276397	0.161384	1.69196e-18	1.17196e-15
chr14:61119417-61119428	0.111385	1.28732e-05	6.10355e-05
chr15:63891697-63891751	-0.124961	6.48279e-08	5.72027e-07
chr15:89920992-89920998	0.139945	0.000334991	0.00109451
chr16:22825312-22825444	0.111557	3.37328e-10	5.86584e-09
chr16:29796570-29796715	0.177472	3.75523e-14	3.15288e-12
chr17:46692408-46692636	0.100609	3.91549e-11	9.43349e-10
chr19:8399747-8399983	-0.14739	1.13415e-06	7.02465e-06
chr19:35630034-35630095	0.127974	6.63163e-10	1.04994e-08
chr19:49646002-49646057	0.103212	8.35875e-07	5.35354e-06
chr19:52391144-52391308	0.134452	8.88694e-09	9.96873e-08
chr19:58629897-58630094	0.129891	2.62003e-09	3.50124e-08
chr2:63278939-63279058	0.138475	9.23118e-10	1.38252e-08
chr2:63281033-63281241	0.156001	4.15412e-13	2.15807e-11
chr2:71116150-71116356	0.112597	3.74577e-07	2.62963e-06
chr2:95984271-95984311	-0.103402	2.75466e-08	2.69691e-07
chr2:105458930-105458977	0.150163	2.51451e-07	1.88633e-06
chr2:106681829-106681949	0.164025	4.65467e-13	2.35912e-11
chr2:118981578-118981584	0.130531	0.0052481	0.0128
chr2:162283977-162284139	0.137645	1.11643e-12	4.80966e-11
chr2:175199707-175199925	0.105147	4.88151e-09	5.92337e-08
chr2:198651643-198651649	0.10284	0.00665914	0.0157389
chr2:223162633-223162696	0.103345	0.0171413	0.0362172
chr20:21504036-21504042	0.109738	1.42068e-06	8.51385e-06
chr22:28838967-28839177	0.127073	1.94578e-12	7.48766e-11
chr22:46262754-46262884	0.119969	4.46045e-15	5.01017e-13
chr3:147106534-147106641	0.125599	1.07863e-17	4.26931e-15
chr3:157821430-157821522	0.10939	9.83872e-11	2.07562e-09
chr3:170303043-170303060	0.155147	8.21926e-05	0.000312957
chr3:172165937-172166057	0.156022	1.41001e-15	1.98645e-13
chr4:206706-206839	0.112984	1.68161e-10	3.23553e-09
chr4:41882449-41882550	0.105807	3.02508e-16	6.79579e-14
chr4:57522380-57522441	0.188423	1.84324e-13	1.14336e-11
chr4:81189702-81189734	0.162567	1.12773e-16	3.60528e-14
chr4:85403927-85404043	0.101127	4.17458e-09	5.14823e-08
chr4:174448904-174449010	0.110922	8.28279e-12	2.47649e-10
chr5:1931762-1931785	0.101909	4.38372e-06	2.2989e-05
chr5:16179834-16179933	0.181583	1.20207e-05	5.72148e-05
chr5:42952005-42952284	0.1132	1.74978e-07	1.3708e-06
chr5:57879467-57879504	0.102232	3.25504e-08	3.09211e-07
chr5:72678021-72678347	0.111596	5.12848e-15	5.60893e-13
chr5:76934296-76934396	0.165796	7.37544e-08	6.43281e-07
chr5:115152632-115152664	0.16699	2.56839e-05	0.000112598
chr5:170736163-170736490	0.148075	3.02508e-16	6.79579e-14
chr6:6004041-6004227	0.125874	5.79274e-13	2.80314e-11
chr6:100060776-100060873	0.129362	2.68069e-11	6.71141e-10
chr6:108488178-108488359	0.125404	1.04625e-15	1.58117e-13
chr7:27205157-27205425	0.108788	7.28463e-18	3.02749e-15
chr7:27241868-27242101	0.132616	3.73296e-20	7.75709e-17
chr7:27244671-27244727	0.14087	1.98271e-08	2.01717e-07
chr7:31093017-31093123	0.110601	1.68982e-11	4.45899e-10
chr7:39649385-39649513	0.189304	3.02508e-16	6.79579e-14
chr7:121946588-121946684	0.131964	3.5483e-16	7.19353e-14
chr7:133811696-133811707	0.139604	8.28279e-12	2.47649e-10
chr7:145812840-145812846	0.101323	0.000209979	0.000719657
chr7:157781755-157781823	-0.123999	6.93675e-08	6.06291e-07
chr8:26305852-26305858	-0.100853	0.00323844	0.008425
chr8:70982113-70982253	0.161272	3.5483e-16	7.19353e-14
chr8:72468789-72468855	0.107454	3.67467e-10	6.35007e-09
chr8:77586470-77586521	0.10547	3.17736e-08	3.04265e-07
chr9:23821048-23821149	0.130493	1.03055e-08	1.13757e-07
chr9:37038098-37038165	0.128676	2.00949e-11	5.20339e-10
chr9:122132303-122132346	0.115748	0.00019692	0.000679735
chr9:124976429-124976662	-0.116708	0.000332083	0.00109015
chr9:126777788-126777830	0.122388	2.94963e-07	2.14876e-06
